# Supplementary material for: HABP2 p.G534E variant in patients with family history of thyroid and breast cancer
Source: PubMed Central journal article supplement (PMC5522276; doi:10.18632/oncotarget.16639), 2017-03-29
Supplement: oncotarget-08-40896-s001.pdf [file oncotarget-08-40896-s001.pdf]

## ***HABP2* p.G534E variant in patients with family history of thyroid and breast cancer**

### **SUPPLEMENTARY TABLES**

**Supplementary Table 1: Clinical features and *HABP2* p.G534E status for patients from families 1, 2 and 3**

See Supplementary File 1

Supplementary Table 2: Clinical characteristics of 50 sporadic PTC patients tested for HBP2 status

| Characteristics                                    | N° of Patients (%)   |
|----------------------------------------------------|----------------------|
| <b>Age (years)</b>                                 | median 40 (21-75)    |
| <b>Gender</b>                                      |                      |
| Female                                             | 39 (78)              |
| Male                                               | 11 (22)              |
| <b>Tumor dimension (cm) of predominant variant</b> | median 1.5 (0.3-5.5) |
| Classic                                            | 32 (64)              |
| Follicular                                         | 16 (32)              |
| Rare                                               | 2 (4)                |
| <b>Perineural invasion</b>                         |                      |
| No                                                 | 45 (90)              |
| Yes                                                | 4 (8)                |
| Ni                                                 | 1 (2)                |
| <b>Extrathyroidal extension</b>                    |                      |
| No                                                 | 31 (62)              |
| Yes                                                | 19 (38)              |
| Ni                                                 | 1 (2)                |
| <b>Lymph node metastasis</b>                       |                      |
| No (cN0, pN0)                                      | 34 (68)              |
| Yes (pN1)                                          | 16 (32)              |

Ni: not informed.

**Supplementary Table 3: Variants identified in genes recently reported as associated with NMTC**

See Supplementary File 2

**Supplementary Table 4: Variants ranked per pathogenicity prediction using dbNSFP**

See Supplementary File 3

**Supplementary Table 5: Pathway enrichment analysis and physical proteins interactions**

See Supplementary File 4
